# Supplementary material
Source: PubMed Central journal article supplement (PMC4667563)
Supplement: NIHMS739055-supplement-supplement.pdf [file NIHMS739055-supplement-supplement.pdf]

## Appendix Tables

Appendix Table 1: Definitions of co-morbidities and medications, based on codes and prescriptions in 365 days prior to exposure

Description of construction of propensity score model

Appendix Table 2: Odds of receiving metformin compared to sulfonylureas

Appendix Table 3: Baseline characteristics of patients with complete covariates by metformin or sulfonylurea exposure status

Appendix Table 4: Yearly unadjusted incidence rates, unadjusted incidence rate difference, and adjusted incidence rate difference with 95% confidence intervals [CI] for cardiovascular disease or death (primary composite outcome) among propensity matched cohort of new users of sulfonylureas compared to metformin.

Appendix Table 5: Rates and adjusted hazard ratios (95% confidence intervals [CI]) for risk of cardiovascular disease or death (primary composite outcome) and cardiovascular events (secondary outcome) among the full cohort of new users of sulfonylureas compared to metformin, stratified by age, cardiovascular disease history and body mass index. Similar analyses for sample of 14.3% of patients with urine protein measurement, by proteinuria status.

Appendix Table 6: Rates and adjusted hazard ratios (95% confidence interval [CI]) for risk of cardiovascular disease or death (primary composite outcome) and cardiovascular events (secondary outcome) among those with complete covariates who are new users of sulfonylureas compared to metformin.

Appendix Table 7: Risk of cardiovascular disease (CVD) in the presence of an unobserved confounder with a relative hazard of 1.25 for CVD risk, and various prevalence levels of the confounder by exposure group. The bolded numbers correspond to the necessary differential prevalence of such a confounder by exposure group that could account for study results being the result of such confounding.

Appendix Table 8: Risk of cardiovascular disease (CVD) in the presence of an unobserved confounder with a relative hazard of 2.0 for CVD risk, and various prevalence levels of the confounder by exposure group. The bolded numbers correspond to the necessary differential prevalence of such a confounder by exposure group that could account for study results being the result of such confounding.

## Appendix Figure Legends

Appendix Figure 1: Examination of the Proportional Hazards Assumption using Log -log survival plots

Panel A: Complete cohort

Panel B: Matched cohort

Panel C: Cohort with complete covariates

Appendix Figure 2: Distribution of propensity scores by drug

Appendix Figure 3: Adjusted hazard ratios for cardiovascular disease (CVD) or death composite outcome and secondary outcome (CVD alone) among patients with cardiovascular disease (CVD); body mass index (BMI); and age subgroups.

\* Cardiovascular disease (CVD) defined by diagnoses or procedure codes for myocardial infarction, coronary artery disease, transient ischemic attack, stroke, or surgical procedures for repair of peripheral or carotid artery disease in the baseline period.

†Results are also presented for a sample of patients (14.3%) tested for proteinuria and found positive or negative.

Appendix Table 1: Definitions of co-morbidities and medications, based on codes and prescriptions in 365 days prior to exposure

| <b>Condition or Drug Class</b>                                                                      | <b>Definition *</b>                                                                                                                                                                                                                                                                                                                                                                                                                                                                                                                                                           |
|-----------------------------------------------------------------------------------------------------|-------------------------------------------------------------------------------------------------------------------------------------------------------------------------------------------------------------------------------------------------------------------------------------------------------------------------------------------------------------------------------------------------------------------------------------------------------------------------------------------------------------------------------------------------------------------------------|
| Myocardial infarction                                                                               | ICD- 9 diagnosis codes: 410 (acute MI), 412 (old MI), 429.7 (MI sequela)                                                                                                                                                                                                                                                                                                                                                                                                                                                                                                      |
| Obstructive coronary artery disease                                                                 | ICD-9 diagnosis codes: 411; 413 or 414.xx (angina)<br>ICD-9 procedure codes associated with a hospital discharge: 36.01, 36.02, 36.03, 36.05, 36.09, 36.10-36.19,<br>CPT codes: 33533-36, 33510-23, 30, 92980-82, 84, 92995-6 (coronary artery revascularization procedure) or prescription for a long acting nitrate                                                                                                                                                                                                                                                         |
| Transient Ischemic attack or Cerebrovascular Disease/ Stroke or carotid revascularization procedure | ICD-9 diagnosis codes: 435, 430.X; 431.X; 433.x1, 434 (excluding 434.x0), or 436, 433.1<br>ICD-9 procedure codes: 38.12 38.11, 00.61, 00.6339.28 or CPT 35301 or                                                                                                                                                                                                                                                                                                                                                                                                              |
| Peripheral artery disease/ revascularization/ amputation                                            | ICD- 9 diagnosis codes: 440.2, 443.1, 443.9, 442.2; 445.0<br>ICD-9 procedure codes:38.08-09, 38.18, 38.38, 38.39, 38.48, 38.49, 38.88, 38.89, 39.25, 39.29, 39.5<br>CPT codes: 35226,35256, 35286, 35351, 35355, 35371, 35372, 35381, 35454, 35456, 35459, 35473, 35474, 35482, 35483, 35485,35492, 35493, 35495, 35546, 35548, 35549, 35551, 35556, 35558, 35563, 35565, 35566, 35571, 35583, 35585, 35587, 35646, 35651, 35654, 35656, 35661, 35663, 35665, 35666, 35671, 34800, 34802-5) or prescription for pentoxifylline or cilostazol amputations 84.1X; 84.10 – 84.17 |
| Rheumatic/ aortic/mitral valve disease                                                              | ICD-9 diagnosis codes:394, 395, 396, 424.0, 424.1)                                                                                                                                                                                                                                                                                                                                                                                                                                                                                                                            |
| Atrial fibrillation flutter                                                                         | ICD-9 diagnosis code: 427.3                                                                                                                                                                                                                                                                                                                                                                                                                                                                                                                                                   |
| Smoking                                                                                             | ICD-9 diagnosis codes: 305.1, V15.82, 989.84 or prescription for varenicline tartrate or nicotine replacement therapy                                                                                                                                                                                                                                                                                                                                                                                                                                                         |
| COPD/ Emphysema/ Asthma                                                                             | ICD-9 diagnosis codes: 496; 491.2; 491.21; 493.2; 492; 492.8; v81.3; 493; 493.1; 493.9; 493.8; V17.5; 493.82                                                                                                                                                                                                                                                                                                                                                                                                                                                                  |
| ACE Inhibitors or ARBs                                                                              | benazapril; captopril; enalapril; fosinopril; 2ipyrimido; moexipril; perindopril; quinapril; ramipril;trandolapril; candesartan; irbesartan; losartan; olmisartan; telmisartan; valsartan                                                                                                                                                                                                                                                                                                                                                                                     |
| Anti-arrhythmics                                                                                    | amiodarone; flecanide; ibutilide; procainimide; propofenone; quinidine disopyramide; dofetilide; mexiletine; moricizine; tocainide                                                                                                                                                                                                                                                                                                                                                                                                                                            |
| Anticoagulants                                                                                      | warfarin; argatroban; bivalirudin; dalteparin; enoxaprin; eptifibatide, fondaparinux; heparin ; lepirudin; tirofiban tinzaparin                                                                                                                                                                                                                                                                                                                                                                                                                                               |
| Antipsychotic medications                                                                           | lithium; clozapine; haloperidol; loxipine; molindone; olanzipine; paliperidone; quetiapine fumerate; resperidone; aripiprazole; ziprasidone; chlorpromazine; fluphenazine; fluphenazine deconate; mesoridazine; perphenazine; thioridazine; thiothixene; trifluoperazine; triflupromazine                                                                                                                                                                                                                                                                                     |
| Beta-blockers                                                                                       | acebutolol; atenolol, betaxolol; bisoprolol, carvedilol, esmolol, labetalol, metoprolol tartrate, metoprolol succinate, propranolol, penbutolol pindolol nadolol; sotalol; timolol                                                                                                                                                                                                                                                                                                                                                                                            |
| Calcium Channel Blockers                                                                            | amlodipine, isradipine; felodipine, nifedipine, nicardipine; diltiazem (regular and sa), verapamil (regular and sa) nimodipine; nisoldipine; bepridil; caduet                                                                                                                                                                                                                                                                                                                                                                                                                 |
| Digoxin                                                                                             | digoxin                                                                                                                                                                                                                                                                                                                                                                                                                                                                                                                                                                       |
| Statin lipid lowering agents                                                                        | atorvastatin; fluvastatin; lovastatin; simvastatin; rosuvastatin; lovastatin/niacin; ezetamibe/simvastatin;                                                                                                                                                                                                                                                                                                                                                                                                                                                                   |

---

|                                                       |                                                                                                                                                                                                                                            |
|-------------------------------------------------------|--------------------------------------------------------------------------------------------------------------------------------------------------------------------------------------------------------------------------------------------|
| Other lipid lowering agents                           | cholestyramine, colesevelam; clofibrate; colestipol, niacin, niacinamide, fish oil concentrate, omega 3 fatty acids, gemfibrozil, , fenofibrate, dextrothyroxine, fenofibric acid; ezetimibe                                               |
| Thiazide and other diuretics, alone or in combination | chlorthiazide; chlorthalidone; hydrochlorothiazide; methyclothiazide; trichlormethiazide metolazone; indapamide; eplerenone; ameloride; sprinolactone; triamterene; hydrochlorothiazide /triamterene; hydrochlorothiazide/ spironolactone; |
| Nitrates                                              | amyl nitrate; isosorbide dinitrate; isosorbide mononitrate; nitroglycerin (all forms—sustained action, patch, sublingual, ointment; aerosol spray); ranolazine                                                                             |
| Aspirin                                               | aspirin; aspirin/ dipyrimidole                                                                                                                                                                                                             |
| Loop Diuretics                                        | furosemide; ethacrynic acid ; bumetanide; torsemide                                                                                                                                                                                        |
| Other Antihypertensives                               | doxazosin, prazosin, terazosin, clonidine; guanabenz; guanfacine; hydralazine; methyl dopa, metyrosine; reserpine; minoxidil                                                                                                               |
| Platelet inhibitors, not aspirin                      | clopidogrel; ticlopidine; aspirin/ dipyrimidole; dipyrimidole alone                                                                                                                                                                        |

---

\* Each co-morbidity defined as present if there was 1 specified inpatient or 2 specified outpatient codes separated by 30 days, or one specified procedure code or prescription for a medication defining that co-morbidity in the 365 days prior to initiating oral antidiabetic drug.

## Propensity Score

We analyzed 2 cohorts. The first cohort was composed of all eligible persons who initiated either metformin or sulfonylurea monotherapy after 365 days with no exposure to medications for diabetes. The second cohort is a subset of the first and utilized propensity scores to match eligible metformin users to sulfonylurea users. The propensity score is defined as the probability of metformin use, given a particular pattern of baseline covariates. We estimated the propensity score using a logistic regression model in which the dependent variable was 1 for patients who used metformin at baseline and 0 for sulfonylurea users. The model was simple logistic regression, with a third degree polynomial term for continuous covariates and facility of care in the model. Appendix Table 1 and Table 1 in the paper list baseline covariates included. The model for the probability of being a metformin user is displayed in appendix table 2. Two variables were strongly related to metformin initiation. Metformin use increased relative to sulfonylureas over time as reflected by odds ratios for fiscal years 2004 to 2007. Metformin initiation decreased with increasing baseline creatinine as reflected by odds ratios for 0.54. Table 1 in the paper demonstrates the *P* values for metformin and sulfonylurea initiators before and after propensity score matching; after matching, few standardized differences are statistically significant, indicating good balance. Another important assumption for propensity score methods is that every cohort member has a nonzero probability of being either a sulfonylurea user or a metformin user. Any cohort members who must always receive a sulfonylurea or who could never receive a sulfonylurea would be excluded, because the relevant comparison is between persons who are eligible for either drug but who may or may not actually receive one or the other. We tested this assumption by reviewing the overlap in the distribution of the propensity scores in sulfonylurea and metformin initiators. As shown in Appendix Figure 1, this distribution differed slightly for users of metformin and sulfonylurea but the overlap was nearly complete. The model yielded a C statistic of 0.71.

Appendix Table 2: Odds ratios (95% confidence limits) of metformin compared to sulfonylurea initiation controlling for all variables in table.

| <b>Odds Ratio Estimates for Metformin use</b> |                   |                              |       |
|-----------------------------------------------|-------------------|------------------------------|-------|
|                                               | <b>Odds Ratio</b> | <b>95% Confidence Limits</b> |       |
| <b>Co-morbidities</b>                         |                   |                              |       |
| Coronary disease or AMI                       | 0.995             | 0.988                        | 1.002 |
| TIA stroke or carotid disease                 | 0.901             | 0.892                        | 0.910 |
| Peripheral artery disease                     | 0.931             | 0.921                        | 0.942 |
| Rheumatic/ aortic/mitral valve disease        | 1.055             | 1.030                        | 1.081 |
| Atrial fibrillation/ flutter                  | 1.032             | 1.019                        | 1.046 |
| Smoking                                       | 1.014             | 1.007                        | 1.021 |
| COPD/ Emphysema/ Asthma                       | 1.053             | 1.043                        | 1.064 |
| <b>Medications</b>                            |                   |                              |       |
| Aspirin_365                                   | 1.041             | 1.035                        | 1.047 |
| ACEI_ARBS                                     | 1.023             | 1.019                        | 1.027 |
| AntiArrhythmics                               | 0.825             | 0.809                        | 0.842 |
| Anticoagulants                                | 0.946             | 0.936                        | 0.956 |
| Antipsychotics                                | 0.938             | 0.931                        | 0.945 |
| BetaBlockers                                  | 0.980             | 0.976                        | 0.985 |
| CalciumChannelBlockers                        | 0.992             | 0.987                        | 0.997 |
| Digoxin                                       | 0.875             | 0.866                        | 0.884 |
| Lipid lowering meds Statins                   | 1.312             | 1.306                        | 1.317 |
| Lipid lowering meds NonStatins                | 1.069             | 1.063                        | 1.076 |
| Thiazide and Other Diuretics                  | 1.070             | 1.065                        | 1.075 |
| Nitrates                                      | 0.895             | 0.888                        | 0.903 |
| LoopDiuretics                                 | 0.696             | 0.691                        | 0.701 |
| OtherAntihypertensives                        | 0.995             | 0.990                        | 1.001 |
| Platelet Inhibitors nonaspirin                | 0.941             | 0.934                        | 0.949 |
| <b>Demographics</b>                           |                   |                              |       |

|                                                 |       |       |       |
|-------------------------------------------------|-------|-------|-------|
| Mean centered age                               | 0.991 | 0.991 | 0.991 |
| Mean centered age <sup>2</sup>                  | 0.999 | 0.999 | 0.999 |
| Mean centered age <sup>3</sup>                  | 1.000 | 1.000 | 1.000 |
| gender_female                                   | 1.335 | 1.321 | 1.350 |
| race_black                                      | 0.947 | 0.941 | 0.953 |
| race_hispanic                                   | 0.829 | 0.818 | 0.841 |
| race_other                                      | 0.910 | 0.901 | 0.918 |
| Fiscal year_2004                                | 1.135 | 1.128 | 1.142 |
| Fiscal year_2005                                | 1.349 | 1.340 | 1.358 |
| Fiscal year_2006                                | 1.608 | 1.597 | 1.618 |
| Fiscal year_2007                                | 2.020 | 2.007 | 2.034 |
| <b>Clinical and laboratory indicators</b>       |       |       |       |
| Mean centered hga1c                             | 0.855 | 0.854 | 0.857 |
| Mean centered hga1c <sup>2</sup>                | 1.000 | 1.000 | 1.001 |
| Mean centered hga1c <sup>3</sup>                | 1.001 | 1.001 | 1.001 |
| Mean centered LDL                               | 1.000 | 1.000 | 1.000 |
| Mean centered LDL <sup>2</sup>                  | 1.000 | 1.000 | 1.000 |
| Mean centered LDL <sup>3</sup>                  | 1.000 | 1.000 | 1.000 |
| Mean centered creatinine                        | 0.537 | 0.528 | 0.546 |
| Mean centered creatinine <sup>2</sup>           | 0.022 | 0.021 | 0.023 |
| Mean centered creatinine <sup>3</sup>           | 0.004 | 0.004 | 0.005 |
| Mean centered Systolic                          | 0.996 | 0.996 | 0.996 |
| Mean centered Systolic <sup>2</sup>             | 1.000 | 1.000 | 1.000 |
| Mean centered Systolic <sup>3</sup>             | 1.000 | 1.000 | 1.000 |
| Mean centered Diastolic                         | 1.002 | 1.001 | 1.002 |
| Mean centered Diastolic <sup>2</sup>            | 1.000 | 1.000 | 1.000 |
| Mean centered Diastolic <sup>3</sup>            | 1.000 | 1.000 | 1.000 |
| Mean centered BMI                               | 1.040 | 1.040 | 1.040 |
| Mean centered BMI <sup>2</sup>                  | 0.999 | 0.999 | 0.999 |
| Mean centered BMI <sup>3</sup>                  | 1.000 | 1.000 | 1.000 |
| <b>Indicators of Healthcare Utilization</b>     |       |       |       |
| Mean centered OutPtMeds                         | 0.986 | 0.985 | 0.987 |
| Mean centered OutPtMeds <sup>2</sup>            | 0.999 | 0.999 | 0.999 |
| Mean centered OutPtMeds <sup>3</sup>            | 1.000 | 1.000 | 1.000 |
| Mean centered OutPtVisits                       | 1.001 | 1.000 | 1.001 |
| Mean centered OutPtVisits <sup>2</sup>          | 1.000 | 1.000 | 1.000 |
| Mean centered OutPtVisits <sup>3</sup>          | 1.000 | 1.000 | 1.000 |
| Hospitalized in past year                       | 0.854 | 0.847 | 0.861 |
| <b>Indicators of Missing Clinical Variables</b> |       |       |       |
| BMI missing                                     | 0.855 | 0.845 | 0.865 |
| Creatinine missing                              | 0.774 | 0.770 | 0.779 |
| Diastolic missing                               | 0.415 | 0.343 | 0.502 |
| hga1c missing                                   | 0.945 | 0.940 | 0.949 |
| LDL missing                                     | 0.914 | 0.910 | 0.918 |
| Systolic missing                                | 2.747 | 2.270 | 3.324 |
| Race missing                                    | 1.157 | 1.147 | 1.167 |
| <b>VHA Medical Center</b>                       |       |       |       |
| VA station 402 vs 757                           | 2.103 | 2.030 | 2.179 |
| VA station 405 vs 757                           | 1.953 | 1.875 | 2.035 |
| VA station 436 vs 757                           | 1.619 | 1.558 | 1.682 |
| VA station 437 vs 757                           | 0.908 | 0.875 | 0.943 |
| VA station 438 vs 757                           | 1.317 | 1.269 | 1.366 |
| VA station 442 vs 757                           | 1.858 | 1.771 | 1.950 |
| VA station 459 vs 757                           | 1.213 | 1.164 | 1.265 |
| VA station 460 vs 757                           | 1.592 | 1.535 | 1.650 |
| VA station 463 vs 757                           | 3.508 | 3.338 | 3.686 |
| VA station 501 vs 757                           | 1.771 | 1.712 | 1.833 |

---

|            |            |       |       |       |
|------------|------------|-------|-------|-------|
| VA station | 502 vs 757 | 1.091 | 1.055 | 1.128 |
| VA station | 503 vs 757 | 1.422 | 1.371 | 1.475 |
| VA station | 504 vs 757 | 1.185 | 1.141 | 1.232 |
| VA station | 506 vs 757 | 1.564 | 1.507 | 1.624 |
| VA station | 508 vs 757 | 0.770 | 0.746 | 0.795 |
| VA station | 509 vs 757 | 1.395 | 1.344 | 1.448 |
| VA station | 512 vs 757 | 0.983 | 0.951 | 1.017 |
| VA station | 515 vs 757 | 1.367 | 1.318 | 1.418 |
| VA station | 516 vs 757 | 1.784 | 1.731 | 1.839 |
| VA station | 517 vs 757 | 1.557 | 1.493 | 1.623 |
| VA station | 518 vs 757 | 1.716 | 1.638 | 1.798 |
| VA station | 519 vs 757 | 0.835 | 0.802 | 0.871 |
| VA station | 520 vs 757 | 1.787 | 1.731 | 1.846 |
| VA station | 521 vs 757 | 2.533 | 2.449 | 2.621 |
| VA station | 523 vs 757 | 1.400 | 1.353 | 1.449 |
| VA station | 526 vs 757 | 1.389 | 1.331 | 1.449 |
| VA station | 528 vs 757 | 1.505 | 1.462 | 1.548 |
| VA station | 529 vs 757 | 0.595 | 0.571 | 0.620 |
| VA station | 531 vs 757 | 2.937 | 2.815 | 3.064 |
| VA station | 534 vs 757 | 2.362 | 2.280 | 2.446 |
| VA station | 537 vs 757 | 1.042 | 1.007 | 1.077 |
| VA station | 538 vs 757 | 0.629 | 0.605 | 0.654 |
| VA station | 539 vs 757 | 1.907 | 1.838 | 1.979 |
| VA station | 540 vs 757 | 1.377 | 1.327 | 1.429 |
| VA station | 541 vs 757 | 1.519 | 1.474 | 1.564 |
| VA station | 542 vs 757 | 1.623 | 1.557 | 1.692 |
| VA station | 544 vs 757 | 0.971 | 0.941 | 1.001 |
| VA station | 546 vs 757 | 1.309 | 1.267 | 1.353 |
| VA station | 548 vs 757 | 0.440 | 0.426 | 0.453 |
| VA station | 549 vs 757 | 0.848 | 0.824 | 0.873 |
| VA station | 550 vs 757 | 0.944 | 0.911 | 0.978 |
| VA station | 552 vs 757 | 1.846 | 1.781 | 1.913 |
| VA station | 553 vs 757 | 0.999 | 0.962 | 1.036 |
| VA station | 554 vs 757 | 1.041 | 1.008 | 1.076 |
| VA station | 556 vs 757 | 1.967 | 1.887 | 2.050 |
| VA station | 557 vs 757 | 1.186 | 1.142 | 1.231 |
| VA station | 558 vs 757 | 1.597 | 1.543 | 1.653 |
| VA station | 561 vs 757 | 1.010 | 0.979 | 1.042 |
| VA station | 562 vs 757 | 0.728 | 0.700 | 0.757 |
| VA station | 564 vs 757 | 1.477 | 1.429 | 1.526 |
| VA station | 565 vs 757 | 1.535 | 1.486 | 1.586 |
| VA station | 568 vs 757 | 0.896 | 0.861 | 0.932 |
| VA station | 570 vs 757 | 0.622 | 0.601 | 0.644 |
| VA station | 573 vs 757 | 1.227 | 1.192 | 1.263 |
| VA station | 575 vs 757 | 1.648 | 1.561 | 1.740 |
| VA station | 578 vs 757 | 1.296 | 1.254 | 1.339 |
| VA station | 580 vs 757 | 1.400 | 1.360 | 1.442 |
| VA station | 581 vs 757 | 1.010 | 0.976 | 1.045 |
| VA station | 583 vs 757 | 1.934 | 1.870 | 2.000 |
| VA station | 585 vs 757 | 1.334 | 1.282 | 1.387 |
| VA station | 586 vs 757 | 1.182 | 1.145 | 1.219 |
| VA station | 589 vs 757 | 1.494 | 1.452 | 1.537 |
| VA station | 590 vs 757 | 1.243 | 1.198 | 1.289 |
| VA station | 593 vs 757 | 0.841 | 0.814 | 0.869 |
| VA station | 595 vs 757 | 1.954 | 1.887 | 2.024 |
| VA station | 596 vs 757 | 2.140 | 2.061 | 2.221 |
| VA station | 598 vs 757 | 1.009 | 0.978 | 1.042 |

---

---

|            |            |       |       |       |
|------------|------------|-------|-------|-------|
| VA station | 600 vs 757 | 1.788 | 1.727 | 1.850 |
| VA station | 603 vs 757 | 1.278 | 1.234 | 1.323 |
| VA station | 605 vs 757 | 0.961 | 0.930 | 0.991 |
| VA station | 607 vs 757 | 1.543 | 1.488 | 1.600 |
| VA station | 608 vs 757 | 1.761 | 1.688 | 1.838 |
| VA station | 610 vs 757 | 1.496 | 1.447 | 1.547 |
| VA station | 612 vs 757 | 0.655 | 0.636 | 0.674 |
| VA station | 613 vs 757 | 0.959 | 0.927 | 0.993 |
| VA station | 614 vs 757 | 1.193 | 1.155 | 1.233 |
| VA station | 618 vs 757 | 1.371 | 1.328 | 1.414 |
| VA station | 619 vs 757 | 1.061 | 1.026 | 1.098 |
| VA station | 620 vs 757 | 0.965 | 0.929 | 1.002 |
| VA station | 621 vs 757 | 2.083 | 2.010 | 2.158 |
| VA station | 623 vs 757 | 1.924 | 1.858 | 1.993 |
| VA station | 626 vs 757 | 1.457 | 1.413 | 1.501 |
| VA station | 629 vs 757 | 1.390 | 1.342 | 1.439 |
| VA station | 630 vs 757 | 1.683 | 1.625 | 1.742 |
| VA station | 631 vs 757 | 1.085 | 1.035 | 1.137 |
| VA station | 632 vs 757 | 1.896 | 1.826 | 1.969 |
| VA station | 635 vs 757 | 1.073 | 1.040 | 1.108 |
| VA station | 636 vs 757 | 1.556 | 1.511 | 1.603 |
| VA station | 637 vs 757 | 1.740 | 1.678 | 1.804 |
| VA station | 640 vs 757 | 1.593 | 1.541 | 1.647 |
| VA station | 642 vs 757 | 1.260 | 1.220 | 1.302 |
| VA station | 644 vs 757 | 0.802 | 0.777 | 0.828 |
| VA station | 646 vs 757 | 1.037 | 1.005 | 1.071 |
| VA station | 648 vs 757 | 0.723 | 0.700 | 0.746 |
| VA station | 649 vs 757 | 1.016 | 0.979 | 1.055 |
| VA station | 650 vs 757 | 2.548 | 2.446 | 2.654 |
| VA station | 652 vs 757 | 2.189 | 2.112 | 2.268 |
| VA station | 653 vs 757 | 1.420 | 1.364 | 1.478 |
| VA station | 654 vs 757 | 1.909 | 1.829 | 1.992 |
| VA station | 655 vs 757 | 1.703 | 1.637 | 1.771 |
| VA station | 656 vs 757 | 1.580 | 1.519 | 1.644 |
| VA station | 657 vs 757 | 1.109 | 1.077 | 1.142 |
| VA station | 658 vs 757 | 1.104 | 1.066 | 1.143 |
| VA station | 659 vs 757 | 1.057 | 1.024 | 1.092 |
| VA station | 660 vs 757 | 2.693 | 2.594 | 2.796 |
| VA station | 662 vs 757 | 1.767 | 1.698 | 1.839 |
| VA station | 663 vs 757 | 0.660 | 0.640 | 0.680 |
| VA station | 664 vs 757 | 2.227 | 2.150 | 2.307 |
| VA station | 666 vs 757 | 2.071 | 1.959 | 2.188 |
| VA station | 667 vs 757 | 1.714 | 1.656 | 1.773 |
| VA station | 668 vs 757 | 1.075 | 1.033 | 1.118 |
| VA station | 671 vs 757 | 1.779 | 1.726 | 1.834 |
| VA station | 672 vs 757 | 1.028 | 0.997 | 1.060 |
| VA station | 673 vs 757 | 0.963 | 0.935 | 0.991 |
| VA station | 674 vs 757 | 1.881 | 1.823 | 1.942 |
| VA station | 675 vs 757 | 0.671 | 0.640 | 0.703 |
| VA station | 676 vs 757 | 1.181 | 1.135 | 1.229 |
| VA station | 678 vs 757 | 0.700 | 0.676 | 0.724 |
| VA station | 679 vs 757 | 1.552 | 1.480 | 1.627 |
| VA station | 687 vs 757 | 2.065 | 1.975 | 2.159 |
| VA station | 688 vs 757 | 1.303 | 1.261 | 1.346 |
| VA station | 689 vs 757 | 1.400 | 1.355 | 1.446 |
| VA station | 691 vs 757 | 1.107 | 1.074 | 1.141 |
| VA station | 692 vs 757 | 3.828 | 3.630 | 4.036 |

---

---

|            |            |       |       |       |
|------------|------------|-------|-------|-------|
| VA station | 693 vs 757 | 0.989 | 0.957 | 1.023 |
| VA station | 695 vs 757 | 1.378 | 1.332 | 1.425 |
| VA station | 756 vs 757 | 2.356 | 2.265 | 2.450 |

---



Appendix Table 3: Baseline characteristics of patients with complete covariates by antidiabetic drug

| <b>Characteristic</b>                                                  | <b>Metformin<br/>N=63,584</b> | <b>Sulfonylurea<br/>N=35,199</b> | <b>Standardized<br/>differences †</b> |
|------------------------------------------------------------------------|-------------------------------|----------------------------------|---------------------------------------|
| <b>Age</b> , median (IQR)                                              | 63 (56, 71)                   | 67 (58, 76)                      | 0.3                                   |
| <b>Male</b> (%)                                                        | 95                            | 97                               | 0.09                                  |
| <b>Race</b> , (%)                                                      |                               |                                  |                                       |
| White                                                                  | 81                            | 80                               | 0.01                                  |
| Black                                                                  | 13                            | 13                               | 0                                     |
| Hispanic/ Other                                                        | 6                             | 6                                | 0.01                                  |
| <b>HbA1c</b> , % median (IQR)                                          | 7.0 (6.4, 7.8)                | 7.2 (6.6, 8.1)                   | 0.16                                  |
| <b>Low Density Lipoprotein (mg/dL)</b> mg/dL,<br>median (IQR)          | 102 (81, 127)                 | 101 (80, 126)                    | 0.03                                  |
| <b>Creatinine</b> mg/dL, median (IQR)                                  | 1.0 (0.9,1.2)                 | 1.1 (0.9, 1.3)                   | 0.32                                  |
| <b>Systolic Blood pressure</b> mm/Hg, median (IQR)                     | 134 (124, 144)                | 135 (124,145)                    | 0.06                                  |
| <b>Diastolic Blood pressure</b> mm/Hg, median<br>(IQR)                 | 76 (70, 83)                   | 75 (68, 82)                      | 0.09                                  |
| <b>Body Mass Index (kilograms/meter<sup>2</sup>)</b> , median<br>(IQR) | 32.0 (28.5, 36.2)             | 30.4 (27.2, 34.4)                | 0.27                                  |
| <b>Number of Medications</b> median (IQR)                              | 5 (3, 8)                      | 5 (3, 8)                         | 0.04                                  |
| <b>Outpatient visits</b> , median (IQR)                                | 5 (3, 8)                      | 5 (3, 8)                         | 0                                     |
| <b>Hospitalized</b> (%)                                                | 7                             | 8                                | 0.04                                  |
| <b>Baseline Co-morbidities (%)*</b>                                    |                               |                                  |                                       |
| Myocardial infarction /coronary disease                                | 22                            | 26                               | 0.1                                   |
| Stroke/ transient ischemic attack or carotid<br>revascularization      | 9                             | 11                               | 0.07                                  |
| Peripheral artery disease                                              | 3                             | 4                                | 0.05                                  |
| Smoking                                                                | 11                            | 10                               | 0.07                                  |
| Obstructive pulmonary disease/ Emphysema                               | 9                             | 10                               | 0.03                                  |
| Atrial Fibrillation/ Flutter                                           | 3                             | 5                                | 0.08                                  |
| <b>Fiscal year</b>                                                     |                               |                                  |                                       |
| 2003                                                                   | 11                            | 16                               | 0.13                                  |
| 2004                                                                   | 17                            | 21                               | 0.11                                  |
| 2005                                                                   | 21                            | 23                               | 0.04                                  |
| 2006                                                                   | 25                            | 22                               | 0.07                                  |
| 2007                                                                   | 26                            | 18                               | 0.19                                  |
| <b>Use of Medications (%)</b>                                          |                               |                                  |                                       |
| ACE Inhibitors or ARBs                                                 | 61                            | 62                               | 0.01                                  |
| Beta-blockers                                                          | 39                            | 40                               | 0.04                                  |
| Calcium Channel Blockers                                               | 24                            | 26                               | 0.06                                  |
| Other Antihypertensives                                                | 16                            | 19                               | 0.06                                  |
| Statin lipid lowering agents                                           | 66                            | 62                               | 0.09                                  |
| Other lipid lowering agents                                            | 14                            | 13                               | 0.03                                  |
| Anti-arrhythmics                                                       | 1                             | 1                                | 0.05                                  |
| Anticoagulants                                                         | 5                             | 6                                | 0.07                                  |
| Antipsychotic medications                                              | 8                             | 7                                | 0.02                                  |
| Digoxin                                                                | 3                             | 5                                | 0.12                                  |

|                              |    |    |      |
|------------------------------|----|----|------|
| Thiazide and other diuretics | 34 | 32 | 0.03 |
| Loop Diuretics               | 9  | 13 | 0.13 |
| Nitrates                     | 12 | 15 | 0.09 |
| Aspirin                      | 19 | 20 | 0.01 |
| Platelet inhibitors          | 7  | 9  | 0.07 |

\* Definitions of co-morbidities and medications available in Appendix Table 1

† Standardized differences are the absolute difference in means or percents divided by an evenly weighted pooled standard deviation, or the difference between groups in number of standard deviations. All P values for the comparison of metformin and sulfonylurea users were statistically significant at  $P < 0.001$ , except outpatient visits  $p = 0.016$ , ACE/ARB  $p = 0.08$ ; aspirin use  $p = 0.15$



Appendix Table 4: Yearly unadjusted incidence rates, unadjusted incidence rate difference, and adjusted incidence rate difference with 95% confidence intervals [CI] for cardiovascular disease or death (primary composite outcome) among propensity matched cohort of new users of sulfonylureas compared to metformin.

| <b>Persistent Exposure required*</b>           | <b>Year 1</b>       |                     | <b>Year 2</b>       |                     | <b>Year 3</b>       |                     | <b>Year 4</b>       |                     | <b>Year 5</b>       |                     |
|------------------------------------------------|---------------------|---------------------|---------------------|---------------------|---------------------|---------------------|---------------------|---------------------|---------------------|---------------------|
|                                                | <i>Met</i>          | <i>Sul.</i>         |
| Number at risk                                 | 80648               | 80648               | 33418               | 29502               | 16887               | 14118               | 7976                | 6185                | 3297                | 2301                |
| Person Years                                   | 51344               | 47979               | 24248               | 20848               | 11966               | 9658                | 5381                | 3984                | 1857                | 1272                |
| Cardiovascular events or death                 | 726                 | 739                 | 296                 | 305                 | 129                 | 159                 | 69                  | 56                  | 16                  | 25                  |
| Unadjusted rate/1000 person-years, (95%CI)     | 14.1<br>(13.2,15.2) | 15.4<br>(14.3,16.5) | 12.2<br>(10.9,13.7) | 14.6<br>(13.1,16.4) | 10.8<br>(9.1,12.8)  | 16.4<br>(14.1,19.2) | 12.8<br>(10.1,16.2) | 14.0<br>(10.8,18.2) | 8.6<br>(5.3, 14.0)  | 19.7<br>(13.3,28.9) |
| Unadjusted incidence rate difference (95% CI)  | 1.3 (-0.2, 2.8)     |                     | 2.4 (0.3, 4.6)      |                     | 5.7 (2.6, 8.9)      |                     | 1.2 (-3.4, 6.2)     |                     | 11.0 (2.8, 20.8)    |                     |
| Adjusted incidence rate difference, † (95%CI)  | 2.3 (1.1, 3.5)      |                     | 1.9 (1.0, 3.0)      |                     | 1.7 (0.9, 2.7)      |                     | 2.1 (1.0, 3.2)      |                     | 1.4 (0.7, 2.2)      |                     |
| <b>Persistent exposure not required‡</b>       |                     |                     |                     |                     |                     |                     |                     |                     |                     |                     |
| Number at risk                                 | 80648               | 80648               | 65655               | 64757               | 47552               | 45982               | 30413               | 29104               | 16391               | 15513               |
| Person Years                                   | 74364               | 73730               | 56584               | 55155               | 38755               | 37097               | 23273               | 22070               | 10189               | 9523                |
| Cardiovascular events or death                 | 1199                | 1379                | 916                 | 1023                | 629                 | 760                 | 415                 | 419                 | 167                 | 212                 |
| Unadjusted rate/1000 person-years, (95%CI)     | 16.1<br>(15.2,17.0) | 18.7<br>(17.7,19.6) | 16.2<br>(15.2,17.3) | 18.5<br>(17.5,19.7) | 16.2<br>(15.0,17.5) | 20.5<br>(19.1,22.0) | 17.8<br>(16.2,19.6) | 19.0<br>(17.3,20.9) | 16.4<br>(14.1,19.0) | 22.2<br>(19.5,25.4) |
| Unadjusted rate difference (95% CI)            | 2.6 (1.2, 3.9)      |                     | 2.4 (0.8, 3.9)      |                     | 4.3 (2.3, 6.2)      |                     | 1.2 (-1.3, 3.6)     |                     | 5.9 (2.0, 9.8)      |                     |
| Adjusted incidence rate difference , † (95%CI) | 3.2 (2.4, 4.2)      |                     | 3.2 (2.4, 4.2)      |                     | 3.3 (2.4, 4.2)      |                     | 3.6 (2.7, 4.6)      |                     | 3.3 (2.5, 4.3)      |                     |

\* Primary analysis considers patients persistent on incident regimen until they do not have oral antidiabetic medications for 90 days.

† The adjusted incidence rate difference is the excess in the number of events per 1000 person years of sulfonylurea use compared to the number of events per 1000 person years of metformin use. The difference is calculated as the incidence rate among metformin users\*(adjusted HR -1). The HRs used in each calculation is derived from the respective models presented in Table 2.

‡ Persistent exposure not required analysis- In which patients remain in their exposure group, regardless of persistence on drug therapy, until outcome or end of the study.

Appendix Table 5: Incidence rates and adjusted hazard ratios (95% confidence intervals [CI]) for risk of cardiovascular disease or death (primary composite outcome) and cardiovascular events (secondary outcome) among full cohort of new users of sulfonylureas compared to metformin, stratified by history of CVD, age, and BMI. Similar analyses for sample of patients (14.3%) with urine protein measurement, by proteinuria status. Each analysis considers patients persistent on incident regimen until they do not have OAD medications for 90 days.

|                                                          | <i>Metformin</i>  | <i>Sulfonylurea</i> |
|----------------------------------------------------------|-------------------|---------------------|
| <b>History of CVD*</b>                                   | <b>N=40,577</b>   | <b>N=30,366</b>     |
| Cardiovascular or death rate /1000 person-years (95% CI) | 17.1 (16.0, 18.3) | 28.7 (27.0, 30.6)   |
| Adjusted Hazard ratio† (95% CI)                          | Reference         | 1.26 (1.14, 1.39)   |
| Cardiovascular event rate /1000 person-years (95% CI)    | 13.7 (12.7, 14.8) | 20.8 (19.3, 22.4)   |
| Adjusted Hazard ratio † (95% CI)                         | Reference         | 1.16 (1.05, 1.30)   |
| <b>No history of CVD*</b>                                | <b>N=114,448</b>  | <b>N=68,299</b>     |
| Cardiovascular or death rate /1000 person-years (95% CI) | 7.9 (7.5, 8.4)    | 13.3 (12.5, 14.2)   |
| Adjusted Hazard ratio † (95% CI)                         | Reference         | 1.17 (1.06, 1.29)   |
| Cardiovascular event rate /1000 person-years (95% CI)    | 6.1 (5.7, 6.6)    | 10.0 (9.4, 10.9)    |
| Adjusted Hazard ratio † (95% CI)                         | Reference         | 1.15 (1.03, 1.28)   |
| <b>65 years old and older</b>                            | <b>N=64,009</b>   | <b>N=54,055</b>     |
| Cardiovascular or death rate /1000 person-years (95% CI) | 15.9 (15.0, 16.8) | 24.6 (23.4, 25.9)   |
| Adjusted Hazard ratio † (95% CI)                         | Reference         | 1.18 (1.09, 1.28)   |
| Cardiovascular event rate /1000 person-years (95% CI)    | 12.9 (12.1, 13.7) | 18.5 (17.5, 19.6)   |
| Adjusted Hazard ratio † (95% CI)                         | Reference         | 1.13 (1.03, 1.24)   |
| <b>Less than 65 years old</b>                            | <b>N=91,016</b>   | <b>N=44,610</b>     |
| Cardiovascular or death rate /1000 person-years (95% CI) | 6.1 (5.6, 6.6)    | 9.4 (8.5, 10.3)     |
| Adjusted Hazard ratio † (95% CI)                         | Reference         | 1.28 (1.13, 1.46)   |
| Cardiovascular event rate /1000 person-years (95% CI)    | 4.4 (4.0, 4.8)    | 6.6 (5.8, 7.4)      |
| Adjusted Hazard ratio † (95% CI)                         | Reference         | 1.24 (1.06, 1.44)   |
| <b>BMI <math>\geq</math>30 kg/m<sup>2</sup></b>          | <b>N=92,429</b>   | <b>N=46,033</b>     |
| Cardiovascular or death rate /1000 person-years (95% CI) | 8.3 (7.8, 8.9)    | 13.6 (12.6, 14.7)   |
| Adjusted Hazard ratio † (95% CI)                         | Reference         | 1.24 (1.12, 1.37)   |
| Cardiovascular event rate /1000 person-years (95% CI)    | 6.4 (6.0, 6.9)    | 10.5 (9.6, 11.4)    |
| Adjusted Hazard ratio † (95% CI)                         | Reference         | 1.20 (1.07, 1.34)   |
| <b>BMI &lt;30 kg/m<sup>2</sup></b>                       | <b>N=62,596</b>   | <b>N=52,632</b>     |
| Cardiovascular or death rate /1000 person-years (95% CI) | 13.6 (12.8, 14.5) | 22.6 (21.3, 23.8)   |
| Adjusted Hazard ratio † (95% CI)                         | Reference         | 1.18 (1.06, 1.30)   |
| Cardiovascular event rate /1000 person-years (95% CI)    | 10.8 (10.1, 11.6) | 16.3 (15.3, 17.4)   |

| Adjusted Hazard ratio † (95% CI)                                   | Reference         | 1.11 (0.99, 1.24) |
|--------------------------------------------------------------------|-------------------|-------------------|
| <b>Tested positive for proteinuria (<math>\geq 30</math> mg/g)</b> | <b>N=4580</b>     | <b>N=2979</b>     |
| Cardiovascular or death rate /1000 person-years (95% CI)           | 13.8 (10.8, 17.7) | 20.0 (15.2, 26.2) |
| Adjusted Hazard ratio † (95% CI)                                   | Reference         | 1.13 (0.74, 1.73) |
| Cardiovascular event rate /1000 person-years (95% CI)              | 10.0 (7.5, 13.4)  | 15.6 (11.4, 21.2) |
| Adjusted Hazard ratio † (95% CI)                                   | Reference         | 1.11 (0.67, 1.83) |
| <b>Tested Negative for proteinuria (&lt;30mg/g)</b>                | <b>N=19,302</b>   | <b>N=9564</b>     |
| Cardiovascular or death rate /1000 person-years (95% CI)           | 8.3 (7.2, 9.6)    | 12.7 (10.7, 15.1) |
| Adjusted Hazard ratio † (95% CI)                                   | Reference         | 1.05 (0.84, 1.33) |
| Cardiovascular event rate /1000 person-years (95% CI)              | 7.0 (6.0, 8.2)    | 10.3 (8.4, 12.4)  |
| Adjusted Hazard ratio † (95% CI)                                   | Reference         | 1.02 (0.78, 1.32) |

\* Cardiovascular disease (CVD) defined by diagnoses or procedure codes for myocardial infarction, coronary artery disease, transient ischemic attack, stroke, or surgical procedures for repair of peripheral or carotid artery disease in the baseline period.

† Cox Proportional Hazards model for time to CVD with sandwich variance estimate clustered by VA medical center. Adjusted for age, sex, race, fiscal year of cohort entry, physiologic variables closest to cohort entry (blood pressure, creatinine, glycated hemoglobin [HbA1c], low density lipoprotein levels [LDL] and body mass index [BMI]), indicators of healthcare utilization (number of outpatient visits and active medications, hospitalization during baseline [yes/no]), smoking, selected medications indicative of CVD and presence of co-morbidities (myocardial infarction; obstructive coronary disease or prescription for a long acting nitrate; stroke/ transient ischemic attack; atrial fibrillation/ flutter; mitral/ aortic or rheumatic heart disease; asthma/obstructive pulmonary disease; procedures for carotid/ peripheral artery revascularization or bypass or lower extremity amputation—available in Appendix Table 1). All continuous variables were modeled as third degree polynomials.

Appendix table 6: Rates and adjusted hazard ratios (95% confidence interval [CI]) for risk of cardiovascular disease or death (primary composite outcome) and cardiovascular events (secondary outcome) among those with complete covariates who were new users of sulfonylureas compared to metformin.

|                                          | <b>Metformin</b><br><b>N=63,584</b> | <b>Sulfonylurea</b><br><b>N=35,199</b> |
|------------------------------------------|-------------------------------------|----------------------------------------|
| <b>Persistent exposure required*</b>     |                                     |                                        |
| Cardiovascular events or death           | 755                                 | 626                                    |
| Person Years                             | 75,137                              | 37,791                                 |
| Rate/1000 person-years                   | 10.0 (9.4, 10.8)                    | 16.6 (15.3, 17.9)                      |
| Adjusted Hazard ratio † (95% CI)         | Reference                           | 1.19 (1.07, 1.34)                      |
| Cardiovascular events                    | 602                                 | 493                                    |
| Rate/1000 person-years                   | 8.0 (7.4, 8.7)                      | 13.0 (11.9, 14.2)                      |
| Adjusted Hazard ratio † (95% CI)         | Reference                           | 1.18 (1.03, 1.33)                      |
| <b>Persistent exposure not required‡</b> |                                     |                                        |
| Cardiovascular events or death           | 1919                                | 1865                                   |
| Person Years                             | 147,331                             | 87,740                                 |
| Rate/1000 person-years                   | 13.0 (12.5, 13.6)                   | 21.3 (20.3, 22.2)                      |
| Adjusted Hazard ratio † (95% CI)         | Reference                           | 1.19 (1.11, 1.27)                      |
| Cardiovascular events                    | 1293                                | 1191                                   |
| Rate/1000 person-years                   | 8.8 (8.3, 9.3)                      | 13.6 (12.8, 14.4)                      |
| Adjusted Hazard ratio † (95% CI)         | Reference                           | 1.14 (1.05, 1.24)                      |

\* Primary analysis considers patients persistent on incident regimen until 90 days without drug.

† Cox Proportional Hazards model for time to CVD with Sandwich variance estimate. Adjusted for age, sex, race, fiscal year of cohort entry, physiologic variables closest to cohort entry (blood pressure, creatinine, glycated hemoglobin [HbA1c], low density lipoprotein levels [LDL] and body mass index [BMI]), indicators of healthcare utilization (number of outpatient visits and active medications, hospitalization during baseline [yes/no]), smoking, selected medications indicative of CVD and presence of co-morbidities (myocardial infarction; obstructive coronary disease or prescription for a long acting nitrate; stroke/ transient ischemic attack; atrial fibrillation/ flutter; mitral/ aortic or rheumatic heart disease; asthma/obstructive pulmonary disease; procedures for carotid/ peripheral artery revascularization or bypass or lower extremity amputation—available in Appendix Table 1). All continuous variables were modeled as third degree polynomials.

‡ Persistent exposure not required analysis—patients remain in their exposure group, regardless of persistence on drug therapy, until outcome or end of the study.

Appendix table 7: Risk of cardiovascular disease (CVD) in the presence of an unmeasured confounder with a hazard ratio of 1.25 for CVD\*, and various prevalence levels of the confounder by exposure group. The bolded numbers indicate the hazard ratios that correspond to the necessary differential prevalence of such a confounder by exposure group that could account for study results being the result of such confounding.

|                                                                   |     | <i>Prevalence of unmeasured confounder* in Metformin users</i> |                       |                      |                      |                      |                      |
|-------------------------------------------------------------------|-----|----------------------------------------------------------------|-----------------------|----------------------|----------------------|----------------------|----------------------|
|                                                                   |     | 0.0                                                            | 0.1                   | 0.2                  | 0.3                  | 0.4                  | 0.5                  |
| <b>Prevalence of unmeasured confounder* in Sulfonylurea users</b> | 0.0 | 1.21<br>(1.13, 1.30)                                           | 1.24<br>(1.16, 1.33)  | 1.27<br>(1.19, 1.37) | 1.30<br>(1.22, 1.40) | 1.33<br>(1.24, 1.43) | 1.36<br>(1.27, 1.46) |
|                                                                   | 0.1 | 1.18<br>(1.10, 1.27)                                           | 1.21<br>(1.13, 1.30)  | 1.24<br>(1.16, 1.33) | 1.27<br>(1.19, 1.36) | 1.30<br>(1.21, 1.40) | 1.33<br>(1.24, 1.43) |
|                                                                   | 0.2 | 1.15<br>(1.08, 1.24)                                           | 1.18<br>(1.10, 1.27)  | 1.21<br>(1.13, 1.30) | 1.24<br>(1.16, 1.33) | 1.27<br>(1.18, 1.36) | 1.30<br>(1.21, 1.39) |
|                                                                   | 0.3 | 1.13<br>(1.05, 1.21)                                           | 1.15<br>(1.08, 1.24)  | 1.18<br>(1.10, 1.27) | 1.21<br>(1.13, 1.30) | 1.24<br>(1.16, 1.33) | 1.27<br>(1.18, 1.36) |
|                                                                   | 0.4 | 1.10<br>(1.03, 1.18)                                           | 1.13<br>(1.05, 1.21)  | 1.15<br>(1.08, 1.24) | 1.18<br>(1.10, 1.27) | 1.21<br>(1.13, 1.30) | 1.24<br>(1.16, 1.33) |
|                                                                   | 0.5 | 1.08<br>(1.00, 1.16)                                           | 1.10<br>(1.03, 1.18)  | 1.13<br>(1.06, 1.21) | 1.16<br>(1.08, 1.24) | 1.18<br>(1.11, 1.27) | 1.21<br>(1.13, 1.30) |
|                                                                   | 0.6 | 1.05<br>(0.98, 1.13)                                           | 1.08<br>(1.01, 1.16)  | 1.10<br>(1.03, 1.19) | 1.13<br>(1.06, 1.22) | 1.16<br>(1.08, 1.24) | 1.18<br>(1.11, 1.27) |
|                                                                   | 0.7 | 1.03<br>(0.96, 1.11)                                           | 1.056<br>(0.99, 1.13) | 1.08<br>(1.01, 1.16) | 1.11<br>(1.03, 1.19) | 1.13<br>(1.06, 1.22) | 1.16<br>(1.08, 1.24) |
|                                                                   | 0.8 | 1.01<br>(0.94, 1.08)                                           | 1.034<br>(0.97, 1.11) | 1.06<br>(0.99, 1.14) | 1.08<br>(1.01, 1.16) | 1.11<br>(1.04, 1.19) | 1.13<br>(1.06, 1.22) |
|                                                                   | 0.9 | 0.99<br>(0.92, 1.06)                                           | 1.012<br>(0.95, 1.09) | 1.04<br>(0.97, 1.11) | 1.06<br>(0.99, 1.14) | 1.09<br>(1.02, 1.17) | 1.11<br>(1.04, 1.19) |
|                                                                   | 1.0 | 0.97<br>(0.90, 1.04)                                           | 0.99<br>(0.93, 1.07)  | 1.02<br>(0.95, 1.09) | 1.04<br>(0.97, 1.12) | 1.06<br>(0.99, 1.14) | 1.09<br>(1.02, 1.17) |

\* Unmeasured confounder could be a proposed confounder that was not included in our models or a confounder that was likely underreported in our cohort such as tobacco use.



Appendix table 8: Risk of cardiovascular disease (CVD) in the presence of an unmeasured confounder with a hazard ratio of 2.0 for CVD, and various prevalence levels of the confounder by exposure group. The bolded numbers indicate the hazard ratios that correspond to the necessary differential prevalence of such a confounder by exposure group that could account for study results being the result of such confounding.

|                                                            |     | <i>Prevalence of unmeasured confounder* in Metformin users</i> |                                     |                                    |                                    |                                    |                                    |
|------------------------------------------------------------|-----|----------------------------------------------------------------|-------------------------------------|------------------------------------|------------------------------------|------------------------------------|------------------------------------|
|                                                            |     | 0.0                                                            | 0.1                                 | 0.2                                | 0.3                                | 0.4                                | 0.5                                |
| Prevalence of unmeasured confounder* in Sulfonylurea users | 0.0 | 1.21<br>(1.13, 1.30)                                           | 1.331<br>(1.24, 1.43)               | 1.452<br>(1.36, 1.56)              | 1.573<br>(1.47, 1.69)              | 1.694<br>(1.58, 1.82)              | 1.815<br>(1.70, 1.95)              |
|                                                            | 0.1 | 1.10<br>(1.03, 1.18)                                           | 1.21<br>(1.13, 1.30)                | 1.32<br>(1.23, 1.42)               | 1.43<br>(1.34, 1.54)               | 1.54<br>(1.44, 1.66)               | 1.65<br>(1.54, 1.77)               |
|                                                            | 0.2 | <b>1.01</b><br><b>(0.94, 1.08)</b>                             | 1.109<br>(1.04, 1.19)               | 1.21<br>(1.13, 1.30)               | 1.31<br>(1.22, 1.41)               | 1.412<br>(1.32, 1.52)              | 1.512<br>(1.41, 1.63)              |
|                                                            | 0.3 | 0.931<br>(0.87, 1.00)                                          | <b>1.024</b><br><b>(0.96, 1.10)</b> | 1.117<br>(1.04, 1.20)              | 1.21<br>(1.13, 1.30)               | 1.303<br>(1.22, 1.40)              | 1.396<br>(1.30, 1.50)              |
|                                                            | 0.4 | 0.86<br>(0.81, 0.93)                                           | <b>0.95</b><br><b>(0.89, 1.02)</b>  | <b>1.04</b><br><b>(0.97, 1.11)</b> | 1.12<br>(1.05, 1.21)               | 1.21<br>(1.13, 1.30)               | 1.30<br>(1.21, 1.39)               |
|                                                            | 0.5 | 0.81<br>(0.75, 0.87)                                           | 0.89<br>(0.83, 0.95)                | <b>0.97</b><br><b>(0.90, 1.04)</b> | <b>1.05</b><br><b>(0.98, 1.13)</b> | 1.13<br>(1.06, 1.21)               | 1.21<br>(1.13, 1.30)               |
|                                                            | 0.6 | 0.76<br>(0.71, 0.81)                                           | 0.83<br>(0.78, 0.89)                | 0.91<br>(0.85, 0.98)               | <b>0.98</b><br><b>(0.92, 1.06)</b> | <b>1.06</b><br><b>(0.99, 1.14)</b> | 1.13<br>(1.06, 1.22)               |
|                                                            | 0.7 | 0.71<br>(0.66, 0.77)                                           | 0.78<br>(0.73, 0.84)                | 0.85<br>(0.80, 0.92)               | 0.93<br>(0.86, 0.99)               | <b>1.00</b><br><b>(0.93, 1.07)</b> | <b>1.07</b><br><b>(1.00, 1.15)</b> |
|                                                            | 0.8 | 0.67<br>(0.63, 0.72)                                           | 0.74<br>(0.69, 0.79)                | 0.81<br>(0.75, 0.87)               | 0.87<br>(0.82, 0.94)               | <b>0.94</b><br><b>(0.88, 1.01)</b> | <b>1.01</b><br><b>(0.94, 1.08)</b> |
|                                                            | 0.9 | 0.64<br>(0.59, 0.68)                                           | 0.70<br>(0.65, 0.75)                | 0.76<br>(0.71, 0.82)               | 0.83<br>(0.77, 0.89)               | 0.89<br>(0.83, 0.96)               | <b>0.96</b><br><b>(0.89, 1.03)</b> |
|                                                            | 1.0 | 0.61<br>(0.56, 0.65)                                           | 0.67<br>(0.62, 0.72)                | 0.73<br>(0.68, 0.78)               | 0.79<br>(0.74, 0.85)               | 0.85<br>(0.79, 0.91)               | 0.91<br>(0.85, 0.98)               |

\* Unmeasured confounder could be a proposed confounder that was not included in our models or a confounder that was likely underreported in our cohort such as tobacco use.
